# Supplementary material for: Biologics in Severe Eosinophilic Asthma: Three-Year Follow-Up in a SANI Single Center
Source: MDPI journal article supplement (doi:10.3390/biomedicines10020200), 2022-01-18
Supplement: s1 [file s1]

a. FEV1 (% of predicted value)

| Responders       |             |       | Non-responders   |             |       |
|------------------|-------------|-------|------------------|-------------|-------|
| T0 (68 patients) | 78.8 ± 19.7 |       | T0 (22 patients) | 70.9 ± 20.4 |       |
| T1 (68 patients) | 86.8 ± 19.7 |       | T1 (22 patients) | 77.8 ± 17.4 |       |
| T2 (55 patients) | 87.7 ± 19.1 |       | T2 (18 patients) | 73.6 ± 16.5 |       |
| T3 (36 patients) | 90.8 ± 19.5 |       | T3 (17 patients) | 83.6 ± 17.7 |       |
| T4 (25 patients) | 85.9 ± 18.4 |       | T4 (14 patients) | 76.4 ± 19.7 |       |
| p                |             |       | p                |             |       |
| T0               | T1          | n.s.  | T0               | T1          | n.s.  |
|                  | T2          | n.s.  |                  | T2          | n.s.  |
|                  | T3          | 0.002 |                  | T3          | 0.001 |
|                  | T4          | n.s.  |                  | T4          | n.s.  |

b. FENO (ppb)

| Responders       |             |        | Non-responders   |             |      |
|------------------|-------------|--------|------------------|-------------|------|
| T0 (68 patients) | 46.4 ± 30.9 |        | T0 (22 patients) | 42.9 ± 25.9 |      |
| T1 (68 patients) | 33.9 ± 23.3 |        | T1 (22 patients) | 39.9 ± 27.2 |      |
| T2 (55 patients) | 29.6 ± 23.3 |        | T2 (18 patients) | 37.3 ± 28.2 |      |
| T3 (36 patients) | 23.2 ± 18.1 |        | T3 (17 patients) | 34.1 ± 27.3 |      |
| T4 (25 patients) | 19.1 ± 10.5 |        | T4 (14 patients) | 21.3 ± 12.6 |      |
| p                |             |        | p                |             |      |
| T0               | T1          | 0.043  | T0               | T1          | n.s. |
|                  | T2          | 0.035  |                  | T2          | n.s. |
|                  | T3          | 0.008  |                  | T3          | n.s. |
|                  | T4          | <0.001 |                  | T4          | n.s. |

Table S1 – Trends of the analyzed variables over time in responders and non-responders, comparisons with baseline. Panel a: FEV1 (% of predicted value); Panel b:- FENO (ppb).
